# Supplementary material for: Prenatal Exposure to Metabolism-Disrupting Chemicals, Cord Blood Transcriptome Perturbations, and Birth Weight in a Belgian Birth Cohort
Source: MDPI journal article supplement (doi:10.3390/ijms24087607), 2023-04-20
Supplement: s1 [file s1]

# Supplementary Materials

## **Prenatal exposure to metabolism-disrupting chemicals, cord blood transcriptome perturbations, and birth weight in a Belgian birth cohort**

Anran Cai, Lützen Portengen, Gökhan Ertaylan, Juliette Legler, Roel Vermeulen, Virissa Lenters, Sylvie Remy

### **Table of contents**

**Table S1.** The concentrations of MDCs measured in cord blood among 193 newborns.

**Table S2.** Number of features associated with MDCs at different significance levels (sensitivity analysis: gestational age-unadjusted).

**Table S3.** The individual associations of gene expression with MDCs or birth weight.

**Table S4.** Enriched KEGG pathways associated with MDCs and birth weight at FDR < 0.05.

**Figure S1.** Volcano plots of features in response to MDCs and birth weight.

**Figure S2.** DAG of authors' conception of the associations between prenatal MDC exposures, covariates, and (a) cord blood transcriptome and (b) birth weight among infants born at term.

**Table S1.** The concentrations of MDCs measured in cord blood among 193 newborns.

|                  | <b>Missing, <i>n</i> (%)</b> | <b>LOQ (ng/L)</b> | <b>&gt; LOQ (%)</b> | <b>Median (P25-P75) (ng/L)</b> | <b>Median <sup>a</sup> (P25-P75) (ng/g lipid)</b> |
|------------------|------------------------------|-------------------|---------------------|--------------------------------|---------------------------------------------------|
| <i>p,p'</i> -DDE | 2 (1)                        | 20                | 100                 | 157 (91-255)                   | 75.0 (45.8-134.0)                                 |
| PCB-153          | 2 (1)                        | 20                | 97                  | 54 (40-85)                     | 28.7 (18.7-39.4)                                  |
| PFOA             | 25 (13)                      | 300               | 100                 | 1600 (1100-2100)               |                                                   |
| PFOS             | 25 (13)                      | 300               | 100                 | 2700 (1700-3700)               |                                                   |

<sup>a</sup> Lipophilic chemicals *p,p'*-DDE and PCB-153 were lipid-standardized and expressed in ng/g lipid.

Abbreviations: MDCs, metabolism-disrupting chemicals; *p,p'*-DDE, dichlorodiphenyldichloroethylene; PCB-153, polychlorinated biphenyl 153; PFOA, perfluorooctanoic acid; PFOS, perfluorooctane sulfonic acid; LOQ, limit of quantification; P, percentile.

**Table S2.** Number of features associated with MDCs at different significance levels (sensitivity analysis: gestational age-unadjusted).

|                  | <b>FDR &lt; 0.05</b> | <b>FDR &lt; 0.20</b> | <b><i>p</i>-value &lt; 0.01</b> | <b><i>p</i>-value &lt; 0.05</b> |
|------------------|----------------------|----------------------|---------------------------------|---------------------------------|
| <i>p,p'</i> -DDE | 0                    | 0                    | 146                             | 837                             |
| PCB-153          | 0                    | 0                    | 78                              | 634                             |
| PFOA             | 0                    | 0                    | 33                              | 375                             |
| PFOS             | 0                    | 0                    | 79                              | 631                             |

Abbreviations: MDCs, metabolism-disrupting chemicals; *p,p'*-DDE, dichlorodiphenyldichloroethylene; PCB-153, polychlorinated biphenyl 153; PFOA, perfluorooctanoic acid; PFOS, perfluorooctane sulfonic acid; FDR, false discovery rate.

**Table S3.** The individual associations of gene expression with MDCs or birth weight,  $\beta$  ( $p$ -value).

| ProbeID      | GeneSymbol | $p,p'$ -DDE <sup>a</sup> | PCB-153 <sup>a</sup> | PFOA <sup>a</sup> | PFOS <sup>a</sup> | Birth weight <sup>b</sup> |
|--------------|------------|--------------------------|----------------------|-------------------|-------------------|---------------------------|
| A_23_P90163  | BCAT2      | -0.07 (0.04)             |                      |                   |                   | 128.82 (0.04)             |
| A_23_P129322 | IVD        |                          | -0.17 (0.04)         |                   |                   | -98.48 (0.01)             |
| A_32_P74075  | SLC25A16   |                          | -0.10 (0.02)         |                   |                   | 208.48 (0.01)             |
| A_23_P357229 | HAS3       |                          |                      | 0.04 (0.23)       |                   | 79.70 (0.04)              |
| A_24_P114255 | MBOAT2     |                          |                      |                   | 0.08 (0.03)       | -153.87 (0.04)            |

<sup>a</sup> The effect estimate  $\beta$  refers to log<sub>2</sub>-fold change in gene expression per unit increase in log(MDC).

<sup>b</sup> The effect estimate  $\beta$  refers to birth weight change (g) per log<sub>2</sub>-fold increase in gene expression.

Abbreviations: MDCs, metabolism-disrupting chemicals;  $p,p'$ -DDE, dichlorodiphenyldichloroethylene; PCB-153, polychlorinated biphenyl 153; PFOA, perfluorooctanoic acid; PFOS, perfluorooctane sulfonic acid; FDR, false discovery rate.

**Table S4.** Enriched KEGG pathways associated with MDCs and birth weight at FDR < 0.05.

| <i>p,p'</i> -DDE |                                              |                                                        |       |           |                           |
|------------------|----------------------------------------------|--------------------------------------------------------|-------|-----------|---------------------------|
| Rank             | Pathway                                      | Category                                               | NES   | FDR       | Effective/total gene size |
| 1                | Ribosome                                     | GIP (Translation)                                      | 2.18  | 0.00      | 76/126                    |
| 2                | Allograft rejection                          | HD (Immune disease)                                    | 2.08  | 0.01      | 21/34                     |
| 3                | RNA degradation                              | GIP (Folding, sorting and degradation)                 | 2.05  | 0.01      | 44/74                     |
| 4                | Intestinal immune network for IgA production | OS (Immune system)                                     | 1.93  | 0.02      | 15/38                     |
| 5                | T cell receptor signaling pathway            | OS (Immune system)                                     | 1.93  | 0.02      | 71/91                     |
| 6                | RNA transport                                | GIP (Translation)                                      | 1.92  | 0.02      | 74/149                    |
| 7                | Th1 and Th2 cell differentiation             | OS (Immune system)                                     | 1.92  | 0.02      | 34/81                     |
| 8                | Th17 cell differentiation                    | OS (Immune system)                                     | 1.89  | 0.02      | 38/101                    |
| 9                | Hematopoietic cell lineage                   | OS (Immune system)                                     | 1.86  | 0.02      | 28/87                     |
| 10               | Glycosaminoglycan biosynthesis               | Metabolism (Glycan biosynthesis and metabolism)        | 1.81  | 0.04      | 7/21                      |
| 11               | Inflammatory bowel disease (IBD)             | HD (Immune disease)                                    | 1.80  | 0.04      | 22/59                     |
| 12               | Platelet activation                          | OS (Immune system)                                     | 1.80  | 0.03      | 32/109                    |
| 13               | Autoimmune thyroid disease                   | HD (Immune disease)                                    | 1.79  | 0.03      | 20/40                     |
| 14               | Antigen processing and presentation          | OS (Immune system)                                     | 1.79  | 0.03      | 41/71                     |
| 15               | Ribosome biogenesis in eukaryotes            | GIP (Translation)                                      | 1.75  | 0.04      | 35/72                     |
| 1                | Olfactory transduction                       | OS (Sensory system)                                    | -2.17 | 0.00      | 61/143                    |
| 2                | Taste transduction                           | OS (Sensory system)                                    | -1.95 | 0.03      | 33/59                     |
| PCB-153          |                                              |                                                        |       |           |                           |
| Rank             | Pathway                                      | Category                                               | NES   | FDR       | Effective/total gene size |
| 1                | Ribosome                                     | GIP (Translation)                                      | -2.33 | < 2.2e-16 | 85/126                    |
| 2                | Mismatch repair                              | GIP (Replication and repair)                           | -2.01 | 0.01      | 12/22                     |
| 3                | Fanconi anemia pathway                       | GIP (Replication and repair)                           | -1.84 | 0.04      | 23/46                     |
| PFOA             |                                              |                                                        |       |           |                           |
| Rank             | Pathway                                      | Category                                               | NES   | FDR       | Effective/total gene size |
| 1                | Metabolism of xenobiotics by cytochrome P450 | Metabolism (Xenobiotics biodegradation and metabolism) | 2.22  | < 2.2e-16 | 25/51                     |
| 2                | Drug metabolism                              | Metabolism (Xenobiotics biodegradation and metabolism) | 2.16  | < 2.2e-16 | 23/47                     |
| 3                | Olfactory transduction                       | OS (Sensory system)                                    | 1.88  | 0.02      | 64/143                    |
| 4                | Neuroactive ligand-receptor interaction      | EIP (Signaling molecules and interaction)              | 1.83  | 0.03      | 79/219                    |

|    |                                             |                                        |       |           |        |
|----|---------------------------------------------|----------------------------------------|-------|-----------|--------|
| 1  | Antigen processing and presentation         | OS (Immune system)                     | -2.57 | < 2.2e-16 | 38/71  |
| 2  | Natural killer cell mediated cytotoxicity   | OS (Immune system)                     | -2.53 | < 2.2e-16 | 32/107 |
| 3  | Graft-versus-host disease                   | HD (Immune disease)                    | -2.43 | < 2.2e-16 | 17/36  |
| 4  | Th1 and Th2 cell differentiation            | OS (Immune system)                     | -2.3  | < 2.2e-16 | 27/81  |
| 5  | Spliceosome                                 | GIP (Transcription)                    | -2.06 | 0.00      | 66/124 |
| 6  | Viral myocarditis                           | HD (Cardiovascular disease)            | -2.04 | 0.00      | 19/53  |
| 7  | Type I diabetes mellitus                    | HD (Endocrine and metabolic disease)   | -2.02 | 0.00      | 16/38  |
| 8  | Human immunodeficiency virus 1 infection    | HD (Infectious disease: viral)         | -1.97 | 0.00      | 47/188 |
| 9  | Colorectal cancer                           | HD (Cancer: specific types)            | -1.95 | 0.01      | 35/80  |
| 10 | Cellular senescence                         | CP (Cell growth and death)             | -1.94 | 0.01      | 57/148 |
| 11 | Apoptosis                                   | CP (Cell growth and death)             | -1.92 | 0.01      | 44/125 |
| 12 | Th17 cell differentiation                   | OS (Immune system)                     | -1.89 | 0.01      | 28/101 |
| 13 | Measles                                     | HD (Infectious disease: viral)         | -1.86 | 0.01      | 39/111 |
| 14 | Allograft rejection                         | HD (Immune disease)                    | -1.84 | 0.02      | 14/34  |
| 15 | Herpes simplex infection                    | HD (Infectious disease: viral)         | -1.81 | 0.02      | 59/164 |
| 16 | Salmonella infection                        | HD (Infectious disease: viral)         | -1.80 | 0.02      | 36/74  |
| 17 | B cell receptor signaling pathway           | OS (Immune system)                     | -1.76 | 0.03      | 28/69  |
| 18 | Autophagy                                   | CP (Transport and catabolism)          | -1.75 | 0.03      | 48/121 |
| 19 | FoxO signaling pathway                      | EIP (Signal transduction)              | -1.73 | 0.04      | 44/115 |
| 20 | Epstein-Barr virus infection                | HD (Infectious disease: viral)         | -1.72 | 0.04      | 86/183 |
| 21 | Protein processing in endoplasmic reticulum | GIP (Folding, sorting and degradation) | -1.70 | 0.04      | 54/156 |
| 22 | Proteasome                                  | GIP (Folding, sorting and degradation) | -1.69 | 0.04      | 28/43  |
| 23 | Pathogenic Escherichia coli infection       | HD (Infectious disease: bacterial)     | -1.69 | 0.04      | 20/47  |

#### PFOS

| Rank | Pathway                                   | Category                           | NES   | FDR  | Effective/total gene size |
|------|-------------------------------------------|------------------------------------|-------|------|---------------------------|
| 1    | Leishmaniasis                             | HD (Infectious disease: parasitic) | -2.16 | 0.01 | 41/68                     |
| 2    | Natural killer cell mediated cytotoxicity | OS (Immune system)                 | -2.04 | 0.03 | 49/107                    |
| 3    | Antigen processing and presentation       | OS (Immune system)                 | -2.02 | 0.02 | 34/71                     |
| 4    | Spliceosome                               | GIP (Transcription)                | -2.02 | 0.02 | 70/124                    |
| 5    | B cell receptor signaling pathway         | OS (Immune system)                 | -1.97 | 0.02 | 33/69                     |
| 6    | NOD-like receptor signaling pathway       | OS (Immune system)                 | -1.97 | 0.02 | 59/145                    |

|    |                                                 |                                      |       |      |        |
|----|-------------------------------------------------|--------------------------------------|-------|------|--------|
| 7  | Salmonella infection                            | HD (Infectious disease: viral)       | -1.96 | 0.02 | 36/74  |
| 8  | Graft-versus-host disease                       | HD (Immune disease)                  | -1.92 | 0.02 | 12/36  |
| 9  | Phagosome                                       | CP (Transport and catabolism)        | -1.89 | 0.02 | 34/137 |
| 10 | Amino sugar and nucleotide sugar metabolism     | Metabolism (Carbohydrate metabolism) | -1.88 | 0.02 | 14/42  |
| 11 | Osteoclast differentiation                      | OS (Development and regeneration)    | -1.83 | 0.03 | 46/115 |
| 12 | Acute myeloid leukemia                          | HD (Cancer: specific types)          | -1.82 | 0.03 | 23/61  |
| 13 | Influenza A                                     | HD (Infectious disease: viral)       | -1.81 | 0.03 | 52/147 |
| 14 | Fanconi anemia pathway                          | GIP (Replication and repair)         | -1.79 | 0.04 | 16/46  |
| 15 | Viral myocarditis                               | HD (Cardiovascular disease)          | -1.78 | 0.04 | 14/53  |
| 16 | Mismatch repair                                 | GIP (Replication and repair)         | -1.77 | 0.04 | 11/22  |
| 17 | Pancreatic cancer                               | HD (Cancer: specific types)          | -1.77 | 0.04 | 26/69  |
| 18 | Type I diabetes mellitus                        | HD (Endocrine and metabolic disease) | -1.75 | 0.04 | 22/38  |
| 19 | Kaposi sarcoma-associated herpesvirus infection | HD (Infectious disease: viral)       | -1.72 | 0.04 | 58/165 |
| 20 | Pathogenic Escherichia coli infection           | HD (Infectious disease: bacterial)   | -1.70 | 0.04 | 22/47  |

| Birth weight |                                           |                                           |       |           |                           |
|--------------|-------------------------------------------|-------------------------------------------|-------|-----------|---------------------------|
| Rank         | Pathway                                   | Category                                  | NES   | FDR       | Effective/total gene size |
| 1            | Olfactory transduction                    | OS (Sensory system)                       | 2.75  | < 2.2e-16 | 82/143                    |
| 2            | Neuroactive ligand-receptor interaction   | EIP (Signaling molecules and interaction) | 2.24  | 0.00      | 115/219                   |
| 3            | Nicotine addiction                        | HD (Substance dependence)                 | 2.10  | 0.00      | 17/32                     |
| 4            | Taste transduction                        | OS (Sensory system)                       | 2.04  | 0.00      | 25/59                     |
| 5            | Cytokine-cytokine receptor interaction    | EIP (Signaling molecules and interaction) | 1.95  | 0.01      | 95/221                    |
| 6            | Dilated cardiomyopathy (DCM)              | HD (Cardiovascular disease)               | 1.85  | 0.02      | 23/83                     |
| 1            | Ribosome                                  | GIP (Translation)                         | -2.78 | < 2.2e-16 | 91/126                    |
| 2            | Spliceosome                               | GIP (Transcription)                       | -2.62 | < 2.2e-16 | 75/124                    |
| 3            | Oxidative phosphorylation                 | Metabolism (Energy metabolism)            | -2.43 | < 2.2e-16 | 52/110                    |
| 4            | Proteasome                                | GIP (Folding, sorting and degradation)    | -2.39 | < 2.2e-16 | 31/43                     |
| 5            | Cell cycle                                | CP (Cell growth and death)                | -2.30 | < 2.2e-16 | 70/117                    |
| 6            | Fanconi anemia pathway                    | GIP (Replication and repair)              | -2.28 | < 2.2e-16 | 22/46                     |
| 7            | DNA replication                           | GIP (Replication and repair)              | -2.14 | 0.00      | 18/35                     |
| 8            | Non-alcoholic fatty liver disease (NAFLD) | HD (Endocrine and metabolic disease)      | -2.14 | 0.00      | 54/131                    |
| 9            | Nucleotide excision repair                | GIP (Replication and repair)              | -2.13 | 0.00      | 22/42                     |

|    |                                             |                                        |       |      |        |
|----|---------------------------------------------|----------------------------------------|-------|------|--------|
| 10 | Huntington disease                          | HD (Neurodegenerative disease)         | -2.09 | 0.00 | 80/166 |
| 11 | Mismatch repair                             | GIP (Replication and repair)           | -2.05 | 0.00 | 15/22  |
| 12 | Parkinson disease                           | HD (Neurodegenerative disease)         | -2.01 | 0.00 | 49/116 |
| 13 | RNA transport                               | GIP (Translation)                      | -2.00 | 0.00 | 65/149 |
| 14 | Autophagy                                   | CP (Transport and catabolism)          | -1.91 | 0.01 | 13/31  |
| 15 | Homologous recombination                    | GIP (Replication and repair)           | -1.91 | 0.01 | 23/36  |
| 16 | Autophagy_1                                 | CP (Transport and catabolism)          | -1.85 | 0.01 | 32/121 |
| 17 | Thermogenesis                               | OS (Environmental adaptation)          | -1.85 | 0.01 | 88/196 |
| 18 | Alzheimer disease                           | HD (Neurodegenerative disease)         | -1.85 | 0.01 | 50/152 |
| 19 | Protein processing in endoplasmic reticulum | GIP (Folding, sorting and degradation) | -1.83 | 0.01 | 73/156 |
| 20 | RNA polymerase                              | GIP (Transcription)                    | -1.78 | 0.02 | 14/27  |
| 21 | mRNA surveillance pathway                   | GIP (Translation)                      | -1.77 | 0.02 | 34/84  |
| 22 | Cysteine and methionine metabolism          | Metabolism (Amino acid metabolism)     | -1.77 | 0.02 | 13/40  |
| 23 | Protein export                              | GIP (Folding, sorting and degradation) | -1.72 | 0.03 | 15/23  |
| 24 | Sulfur metabolism                           | Metabolism (Energy metabolism)         | -1.70 | 0.03 | 8/12   |
| 25 | Valine, leucine and isoleucine degradation  | Metabolism (Energy metabolism)         | -1.69 | 0.04 | 16/43  |
| 26 | Ubiquitin mediated proteolysis              | GIP (Folding, sorting and degradation) | -1.68 | 0.04 | 50/126 |
| 27 | Fatty acid biosynthesis                     | Metabolism (Lipid metabolism)          | -1.67 | 0.04 | 16/35  |

The highlighted cells in ranks columns refer to positive (blue) and inverse (orange) associations and the red font in pathway columns denote metabolism-related pathways. Abbreviations: MDCs, metabolism-disrupting chemicals; *p,p'*-DDE, dichlorodiphenyldichloroethylene; PCB-153, polychlorinated biphenyl 153; PFOA, perfluorooctanoic acid; PFOS, perfluorooctane sulfonic acid; KEGG, Kyoto Encyclopedia of Genes and Genomes; NES, normalized enrichment score; FDR, false discovery rate; GIP, Genetic Information Processing; OS, Organismal Systems; EIP, Environmental Information Processing; CP, Cellular Processes; HD, Human Diseases.





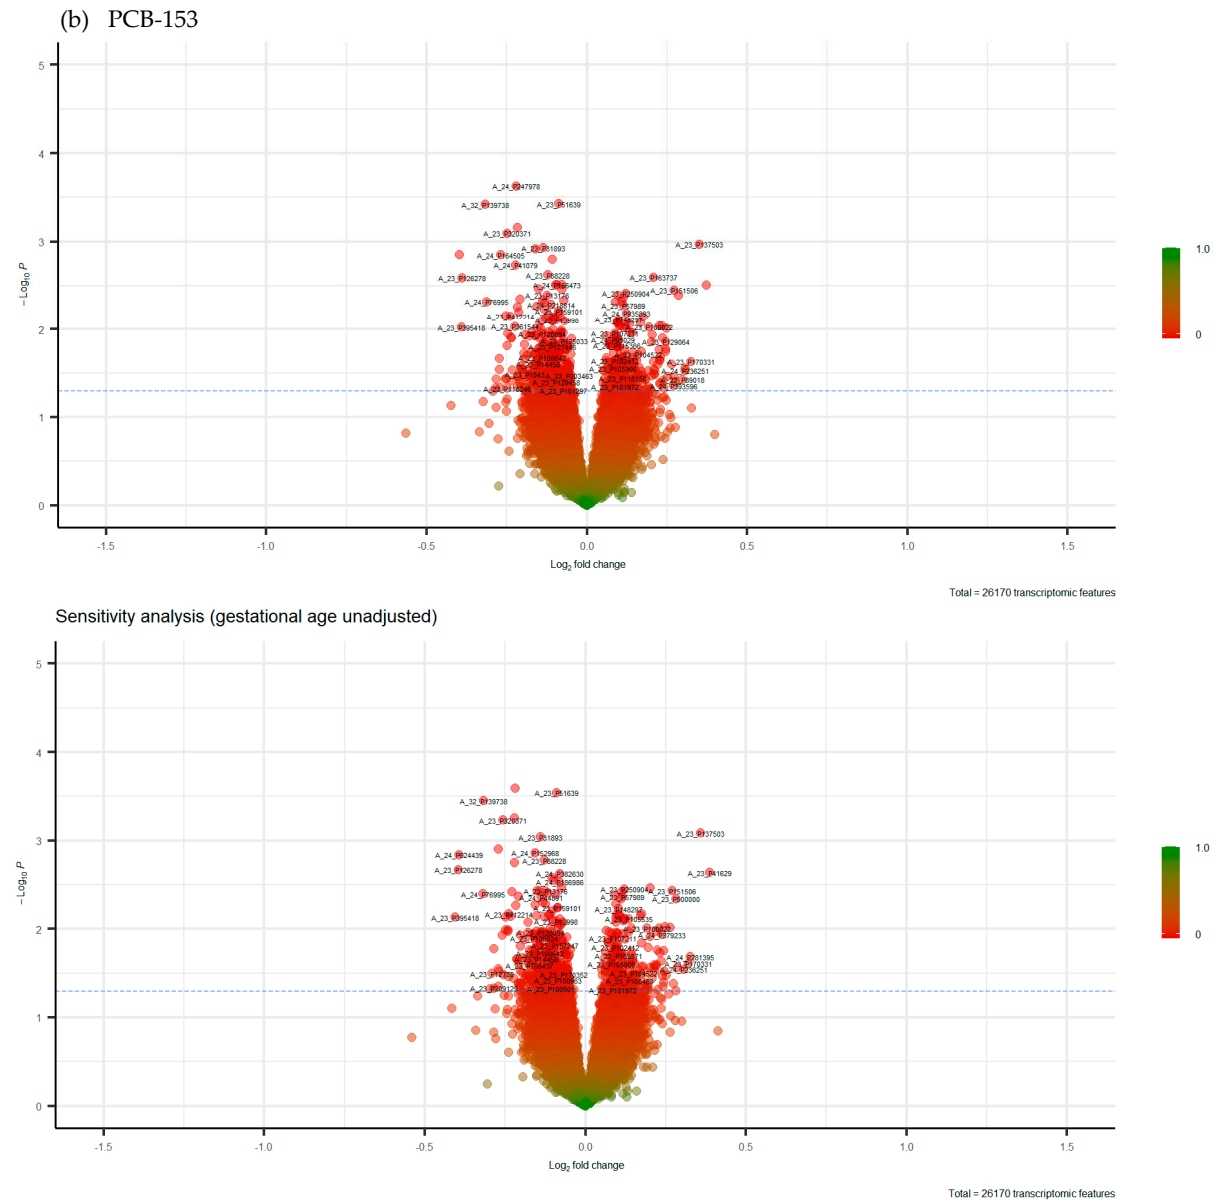



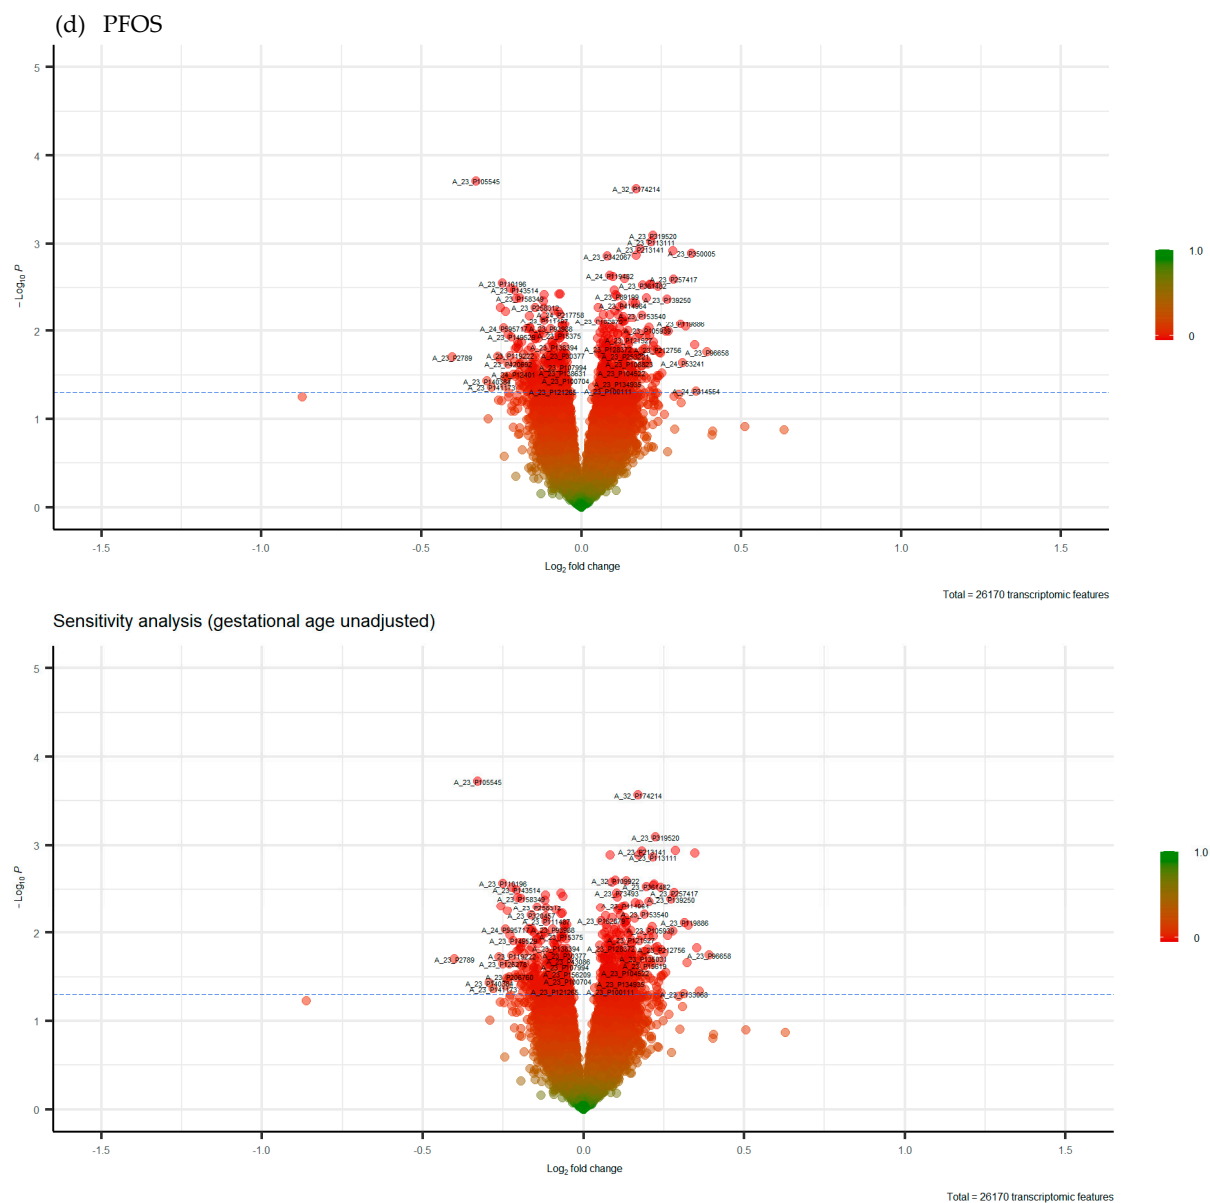

(e) Birth weight

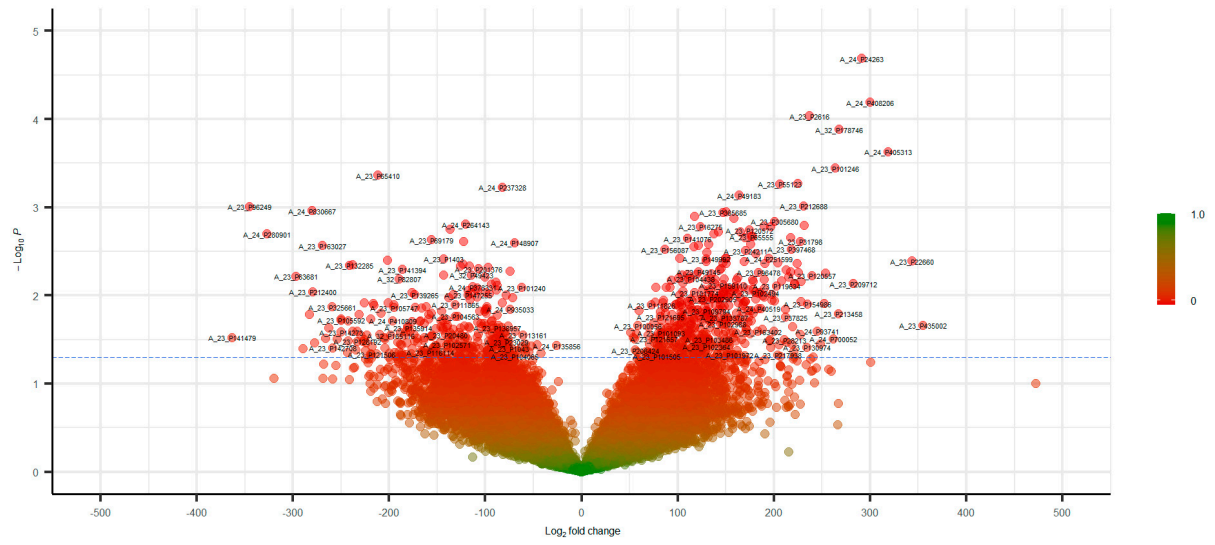

Total = 26170 transcriptomic features

**Figure S1 continued**

a)

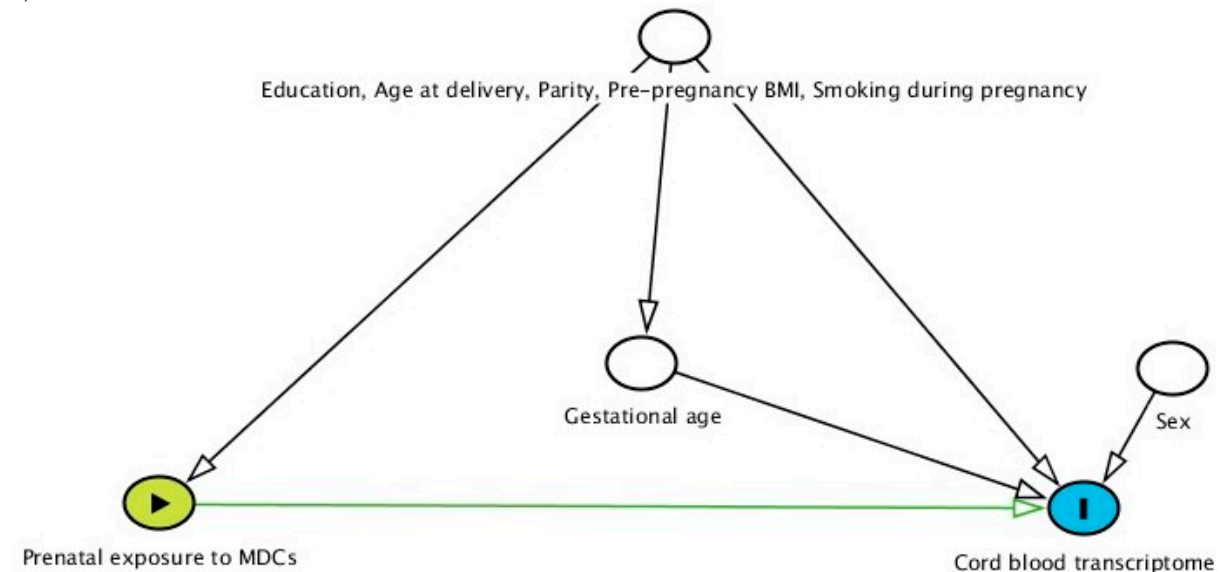

b)

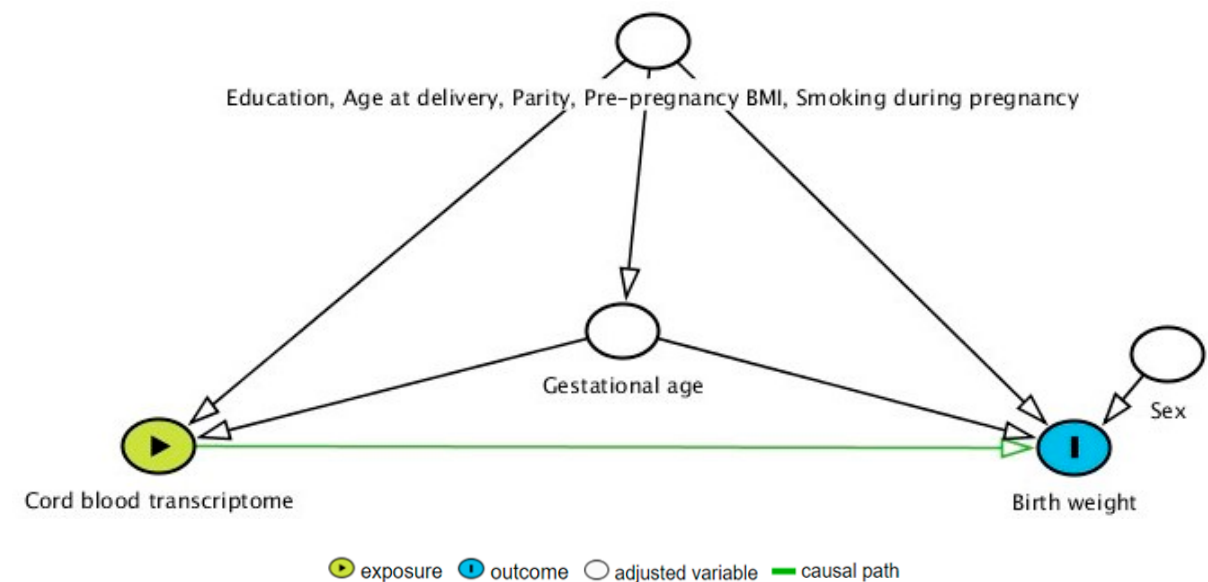

**Figure S2.** DAG of authors' conception of the associations between prenatal MDC exposures, covariates, and (a) cord blood transcriptome and (b) birth weight among infants born at term.

Abbreviations: DAG, Directed acyclic graphs; MDC, metabolism-disrupting chemical; *p,p'*-DDE, dichlorodiphenyldichloroethylene; PCB-153, polychlorinated biphenyl 153; PFOA, perfluorooctanoic acid; PFOS, perfluorooctane sulfonic acid.
